# Supplementary material for: Immune-triggering effect of the foodborne parasite Kudoa septempunctata through the C-type lectin Mincle in HT29 cells
Source: PubMed Central journal article supplement — BMB Rep. 2020 Sep 30;53(9):478–83. doi: 10.5483/BMBRep.2020.53.9.079 (PMC7526980; doi:10.5483/bmbrep.2020.53.9.079), 2020-09-30
Supplement: BMB-53-478_Supple.pdf [file BMB-53-478_Supple.pdf]

**Immune-triggering effect of the foodborne parasite *Kudoa septempunctata* through the C-type lectin Mincle in HT29 cells**

Ji-Hun Shin<sup>1</sup>, Jung-Pyo Yang<sup>1</sup>, Seung-Hwan Seo<sup>1</sup>, Sang-Gyun Kim<sup>1</sup>, Eun-Min Kim<sup>2</sup>, Do-Won Ham<sup>1</sup> and Eun-Hee Shin<sup>1,3,\*</sup>

<sup>1</sup>Department of Tropical Medicine and Parasitology, Seoul National University College of Medicine and Institute of Endemic Diseases, Seoul 03080, Republic of Korea

<sup>2</sup>Department of Environmental Medical Biology, Yonsei University College of Medicine, Seoul 03722, Korea

<sup>3</sup>Seoul National University Bundang Hospital, Seongnam 13620, Republic of Korea

**Running title:** Immune-triggering effect of *Kudoa* using Mincle

**\*Corresponding author:** Dr. Eun-Hee Shin, Department of Tropical Medicine and Parasitology, Seoul National University College of Medicine, Seoul 03080, South Korea

**Tel:** +82-2-740-8344

**E-mail:** [ehshin@snu.ac.kr](mailto:ehshin@snu.ac.kr)

**Supplementary Table.** Primer sequences

| <b>Gene</b>                                 | <b>Forward primer (5'-3')</b>        | <b>Reverse primer (5'-3')</b>        | <b>Accession Number</b> |
|---------------------------------------------|--------------------------------------|--------------------------------------|-------------------------|
| <i>K. septempunctata</i><br><b>28S rRNA</b> | CGT CTC TTG TGC TGA<br>TAT GTG TGT G | CAA GTC TAA CGA TCG<br>ATT TGC ACG T | JQ302299                |
| <i>Kudoa Rnl</i>                            | TGC CGT CAT TCT GTT<br>GTA TT        | AAT ACC CAT GCT GTG<br>TTC AT        | AB915832                |
| <i>Kudoa Cox1</i>                           | TTT GTT CAT CGG CAC<br>AAT TC        | ATA GCC TGG AAC AAG<br>GAA TC        | LC014799                |
| <b>IL-8</b>                                 | CTT TCA GAG ACA GCA<br>GAG CAC A     | CAC ACA GAG CTG<br>CAG AAA TCA G     | NM_000584.4             |
| <b>NF-<math>\kappa</math>B</b>              | GAT GGA ACC ACA<br>CCC CTG CA        | AGT CAT CCA GGT CAT<br>AGA GAG       | NM_001165412.1          |
| <b>IL-1<math>\beta</math></b>               | ATG CAC CTG TAC GAT<br>CAC TGA AC    | ACC ACT TGT TGC TCC<br>ATA TCC TGT   | NM_000576.2             |
| <b>TNF-<math>\alpha</math></b>              | CAT GTT GTA GCA AAC<br>CCT CAA GCT   | GAG GAC CTG GGA<br>GTA GAT GAG       | NM_000594.4             |
| <b>CLEC4E</b>                               | TAC GTT AGT CTC AGG<br>TC TCT TC     | CTC CGT GTC CCT GTA<br>CTT TCA TA    | NM_014358.3             |
| <b>GAPDH</b>                                | GGT GAA GTC GGA<br>GTC AAC GGA       | GGT GAA GTC GGA<br>GTC AAC GGA       | NM_001256799.2          |

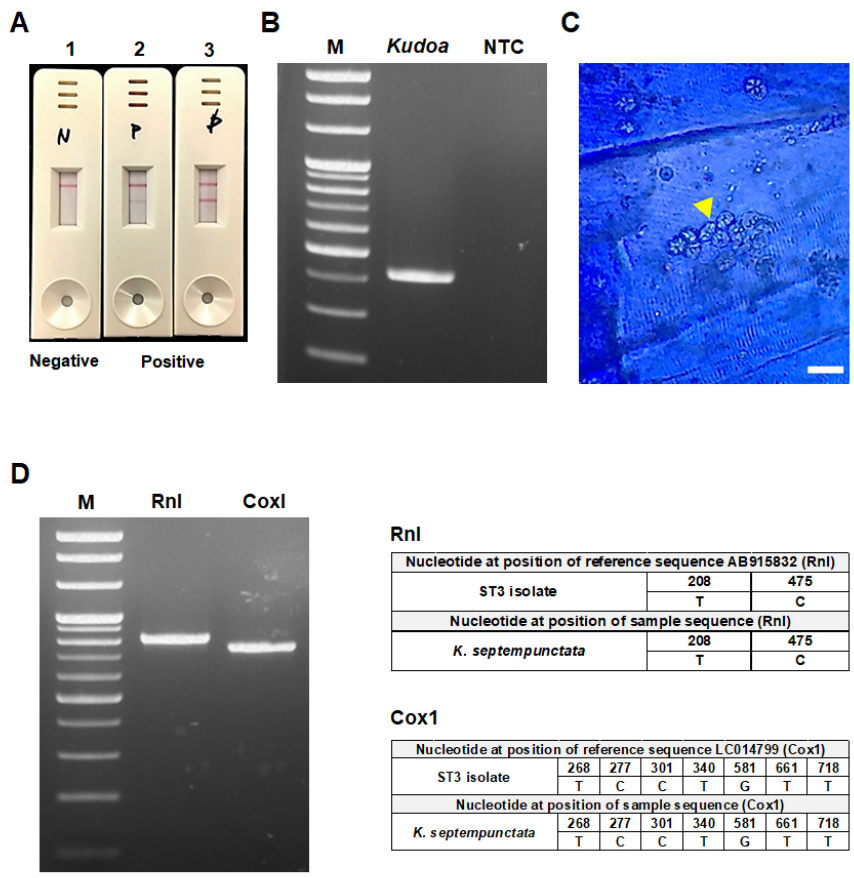

**Supplementary Fig. 1.** Detection of *Kudoa septempunctata* in olive flounder using a commercial kit and PCR.

(A) Rapid check of *Kudoa* infection using an immunochromatographic test kit. (B) Conventional PCR detection of *K. septempunctata* genotype ST3 (425 bp): lane 1, 100-bp marker; lane 2, genomic DNA of *K. septempunctata*; lane 3, negative control. (C) Microscopic observation of *Kudoa* spores consisting of six or seven shell valves and polar capsules ( $\times 200$ , Loeffler's methylene blue staining, yellow arrowhead (*Kudoa* spores), scale bar [25  $\mu\text{m}$ ]) (D) Confirmation of the *K. septempunctata* ST3 genotype via sequencing of *Rn1* and *Cox1*. The BLAST sequencing results and homology analysis of the *K. septempunctata* ST3 genotype.
